RESEARCH ARTICLE

# The seasonality experiment: Investigating how seasons affect the burning conditions of cremations

Elisavet Stamatakis<sup>1,2\*</sup>, Guy De Mulder<sup>3</sup>, Rosalie Hermans<sup>1</sup>, Martine Vercauteren<sup>2</sup>, Christophe Snoeck<sup>1</sup>

**1** Archaeology, Environmental Changes, and Geo-Chemistry Research Group, Vrije Universiteit Brussel, Brussels, Belgium, **2** Research Unit, Anthropology and Human Genetics, Department of Biology of Organisms and Ecology, Université Libre de Bruxelles, Brussels, Belgium, **3** Department of Archaeology, Ghent University, Ghent, Belgium

\* [elisavet.stamatakis@vub.be](mailto:elisavet.stamatakis@vub.be)

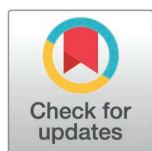

## OPEN ACCESS

**Citation:** Stamatakis E, De Mulder G, Hermans R, Vercauteren M, Snoeck C (2025) The seasonality experiment: Investigating how seasons affect the burning conditions of cremations. PLoS One 20(7): e0327478. <https://doi.org/10.1371/journal.pone.0327478>

**Editor:** Mario Novak, Institute for Anthropological Research, CROATIA

**Received:** February 4, 2025

**Accepted:** June 17, 2025

**Published:** July 9, 2025

**Copyright:** © 2025 Stamatakis et al. This is an open access article distributed under the terms of the [Creative Commons Attribution License](https://creativecommons.org/licenses/by/4.0/), which permits unrestricted use, distribution, and reproduction in any medium, provided the original author and source are credited.

**Data availability statement:** All isotope and infrared data produced in this study are available as an open-access dataset (Stamatakis et al. 2025; <https://doi.org/10.5281/zenodo.14760946>) on Zenodo (<https://zenodo.org/>).

**Funding:** E.S received the Fonds Wetenschappelijk Onderzoek-Vlaanderen

## Abstract

This study investigates the influence of seasons and weather conditions on cremation processes, using experimental archaeology and advanced analytical techniques. Four outdoor cremation experiments were conducted across different seasons in Greece, during which the four fleshed legs (front and hind) of the same domestic pig (*Sus scrofa*) were burned. The study highlights the effects of variables such as temperature, dryness of fuelwood, atmospheric pressure, and precipitation on the structural and chemical composition of burned bones. Results demonstrate a strong correlation between burning conditions and isotopic ( $\delta^{13}\text{C}$ ,  $\delta^{18}\text{O}$ ) as well as infrared indices (Infrared Splitting Factor (IRSF), Carbonyl-to-Carbonate ratio (C/C)), which are temperature-related. Comparisons with archaeological data from Belgium reveal potential seasonal patterns in past cremation practices. The findings underscore the need for expanded experimental research in various geographical areas with different altitudes and weather conditions to further investigate how the location in which burning was performed in combination with weather conditions affected the cremation settings and therefore past funerary practices.

## Introduction

Burned human bones are commonly found in archaeological contexts since cremation was a common funerary practice in past societies [1]. The complexity of studying cremated bones lies in the high state of fragmentation of the remains and the structural and chemical alterations caused by the high temperatures (> 700 °C) reached during the burning process [2–6]. Analysing and interpreting cremated human remains involves a wide range of themes such as demographic data, evidence of

(FWO) (11A6221N) <https://www.fwo.be/en/>  
R.H received the Fonds Wetenschappelijk  
Onderzoek-Vlaanderen (FWO) (11A8922N)  
<https://www.fwo.be/en/>.

**Competing interests:** The authors have  
declared that no competing interests exist.

pathological lesions [e.g., 7–14], diet and mobility [e.g., 15–22], as well as topics about funerary practices and pyrotechnology [e.g., 23–28].

Regarding funerary practices, developments in carbon and oxygen isotope analysis, radiocarbon dating [16,28–42] and Fourier Transform Infrared Spectroscopy in the Attenuated Total Reflectance mode (FTIR-ATR) [25,28,43–51] have provided new insights into the heat alterations of burned bones. These advancements have highlighted the increasing importance of analysing cremated remains to explore various aspects of pyre technology (such as temperature, pyre size, ventilation conditions, etc.) and body management in past societies where cremation was the main funerary practice [26–28,38,52].

In combination with analytical techniques, numerous laboratory and outdoor burning experiments have been conducted to investigate the effect of fire on the human body and the thermal decomposition of skeletal remains [e.g., 8,42,53–62]. Therefore, experimental archaeology through the reconstruction of funerary pyres contributes significantly to increasing our knowledge of how thermal alterations of burned bones are linked to different burning conditions [58–63].

While the study of experimental and archaeological cremated remains provides valuable insights into burning conditions and their relation to funerary rites, there is limited archaeological evidence about the season in which cremation was performed. The lack of written sources from the Metal Ages and the limited written sources from the Roman period makes it extremely difficult to approach questions related to the season and under which weather conditions cremation was performed. This creates a gap in our understanding of funerary practices from chronological periods when cremation was practiced, whether as a dominant or coexisting rite. Understanding the season of cremation is important, as it can shed light on the decision-making processes of living individuals concerning funerary practices influenced by societal rituals, wood availability, and weather constraints. Therefore, it is necessary to turn to other types of evidence, such as experimental archaeology and/or ethnographic information, to further investigate the season and the weather conditions during combustion.

McKinley [54,55,63] assumes that the climate would have significantly influenced the timing of cremations, especially in areas where the weather is often rainy and windy. Since the weather conditions could not be controlled, McKinley [54,63] believes that it might have been necessary to wait for a relatively dry day to perform a cremation and that in certain seasons and areas, this waiting period could have stretched to several weeks. Based on ethnographic evidence from India, the Kol people, when it was too rainy to perform cremation, used to first bury the body for a while following specific rites and then cremate it in a ceremony of three stages [64]. It is expected that funerary pyres would not ignite during heavy rain or if the wood was humid. Strong, veering winds could cause a heterogeneous burning and possibly the collapse of the pyre, with the unwanted slipping of the body, making necessary the presence of someone to manage the funerary pyre and the human body during the burning process. Additionally, heavy, persistent rain could have extinguished the pyre causing also an uneven burning [54,55,63]. This happened during the cremation

of the astrologer Ascleptario, who was executed by Emperor Domitian (ca. 81–96 CE). During his cremation, a sudden storm extinguished the funerary pyre leaving his body half-burnt (Suetonius, Domitianus 15, as cited in Noy 2000 [65]). In another case, the cremation of Sulla was delayed for hours because the day was cloudy. During the cremation, a strong wind helped and speeded up the burning process while heavy rain started falling right after the bone collection (Plutarch, Sulla 38, as cited in Noy 2000 [65]). It seems, that uncontrolled factors, such as the season and the weather conditions in which cremation occurred did not only influence the timing of the cremation but the whole burning environment.

This study aims to combine experimental archaeology and state-of-the-art analytical techniques to investigate how alterations in the structural and chemical composition of burned bones can provide information regarding the season and the weather conditions in which cremation was performed. Exploring how weather conditions affect the burning process and therefore the structural and chemical composition of burned bones is important for understanding in which season cremation was performed in past societies.

## Materials and methods

### Design of the experiment

To investigate the effect of seasons and weather conditions on the structural and chemical composition of burned bones, the four fleshed legs (front and hind) from the same individual domestic pig (*Sus scrofa*) were obtained from a local Greek butchery and burnt in a series of outdoor experiments in different seasons starting in summer 2022 (summer 2022, autumn 2022, winter 2023, spring 2023) (Table 1). This approach ensured isotopic consistency across samples, as intra-individual variability is generally minimal. For all experiments, the distal portions of the limbs—specifically the radius and ulna for the front legs, and tibia and fibula for the hind legs—were selected to standardise body part selection and minimise variability in thermal exposure due to anatomical differences. This allowed for more direct comparison of burning behaviour and bone alteration across seasons.

Although anatomical differences between front and hind limbs in pigs may affect burning due to variations in muscle and fat composition, no significant difference in muscle-to-fat ratio was observed in the specific parts used in this study. Pigs were selected as experimental models due to their anatomical and soft tissue similarities to humans, particularly in the structure of skin, fat, and muscle layers, which make them suitable analogues for experimental research [66]. To ensure comparability across experiments performed in different seasons, the legs were stored frozen at  $-4^{\circ}\text{C}$  until the time of each burning experiment. Prior to burning, they were removed from the freezer and left to thaw and reach ambient temperature for approximately 24 hours.

All the experimental burnings were conducted in the same location at the village of Martino ( $38.6253^{\circ}\text{N}$ ,  $23.2182^{\circ}\text{E}$ ) in central Greece. The village of Martino is located 5.86 km from the sea at an altitude of 256 m. The experiments were carried out on private land owned by the first author. No live animals were used, and the remains were sourced post-mortem from animals slaughtered for commercial purposes, in accordance with national regulations. As the site is privately owned and the materials used were legally obtained animal remains, no permits or field site access approvals were required.

Regarding the burning settings, the origin of the fuelwood, the type and amount of wood (olive tree trunks/ *Olea europaea*), the pyre structure (rectangular shape and layers of logs placed perpendicular to the one before), the size of the pyre (0.5 m x 0.5 m x 0.5 m), the position of the leg on the top of the pyre, and the duration of burning (4 hours) were the same in each experiment (Table 1). Based on the volume and density of olive wood, the estimated weight of fuelwood used per experiment was approximately 110–115 kg. The fires were always ignited from the bottom of each pyre using a blow torch with butane cartridge.

A difference was observed in the dryness of fuelwood used for the different experiments. The olive trunks were fully dry for the experiments that were carried out in summer 2022 and autumn 2022, but they were partially humid for the experiments in winter 2023 and spring 2023, because they were stored outside and were only partially covered and protected

Table 1. Climatic information for the month and the day of the experiments and average recorded temperatures of the pyre and leg.

| Season      | Element | Day Temperature (°C) | Monthly Mean Temperature (°C) | Monthly Max Temperature (°C) | Monthly Min Temperature (°C) | Monthly Precipitation height (mm) | Monthly precipitation anomaly (mm) | Humidity of the day (%) | Wind speed (km/h) | Wind direction | Atmospheric pressure (hPa) | Average Pyre T (°C) | Average Leg T (°C) |
|-------------|---------|----------------------|-------------------------------|------------------------------|------------------------------|-----------------------------------|------------------------------------|-------------------------|-------------------|----------------|----------------------------|---------------------|--------------------|
| Winter 2023 | Hind    | 10                   | 9.4                           | 14.5                         | 5.1                          | 62                                | 10                                 | 70                      | 5                 | NW             | 1013                       | 613                 | 472                |
| Spring 2023 | Front   | 16                   | 18.6                          | 22.5                         | 11.9                         | 14                                | 24                                 | 75                      | 12                | N              | 1018                       | 647                 | 524                |
| Summer 2022 | Hind    | 26                   | 28                            | 28                           | 19.8                         | 27                                | 10                                 | 30                      | 24                | SW             | 1019                       | 595                 | 462                |
| Autumn 2022 | Front   | 18                   | 17.9                          | 17.9                         | 12.7                         | 9                                 | -6                                 | 40                      | 10                | NW             | 1022                       | 625                 | 483                |

<https://doi.org/10.1371/journal.pone.0327478.t001>

from rainfall. The temperature was recorded every 15 minutes on the four sides of the pyre (N, E, S, and W sides) and the leg using a PCE-890U infrared thermometer [67]. In all cases, the burned pig bones were carefully collected the next morning and, in total, 26 samples were analysed for this study (n=6 summer 2022; n=8 autumn 2022; n=7 winter 2023; n=5 spring 2023) [67].

According to the climatic report of the Hellenic National Meteorological Service (HNMS) [68] for the region of the experiments (Table 1), July 2022 was a warm but rainy month. The monthly temperature ranged from 19.8 °C to 31.9 °C with a mean temperature of 28 °C. The monthly precipitation height was 27 mm with a monthly anomaly of 10 mm (Monthly Anomaly = Observed Precipitation – Long-term Average Precipitation). According to HNMS, a positive anomaly indicates more precipitation than the recorded long-term average, representing wetter conditions. A negative anomaly indicates drier weather conditions. At the time of the experiment, the ambient temperature was 26 °C, the humidity was 30%, the wind was 24 km/h with SW direction, and the atmospheric pressure was 1019 hPa.

October 2022 was a warm and relatively dry month for the area in which the experiment was performed with temperatures higher than normal [68]. The monthly temperature ranged from 12.7 °C to 23.1 °C with a mean temperature of 17.9 °C and the monthly precipitation height was 9 mm with a monthly anomaly of –6 mm. At the time of the experiment, the ambient temperature was 18 °C, the humidity was 40%, the wind was 10 km/h with NW direction, and the atmospheric pressure was 1022 hPa (Table 1).

January 2023 was also a warm month, and the monthly temperature was ranging from 5.1 °C to 14.5 °C with a mean temperature of 9.4 °C [68]. The mean precipitation height (62 mm) was higher than normal for the region. The monthly precipitation anomaly was 10 mm and large amounts of snow were recorded over the tops of the mountains (Parnassos and Giona) during the last ten days of the month. At the time of the experiment, the ambient temperature was 10 °C, the humidity was 70%, the wind was 5 km/h with NW direction, and the atmospheric pressure was 1013 hPa (Table 1).

May 2023 was a relatively cold month for the region [68]. The monthly temperature was ranging from 11.9 °C to 22.5 °C with a mean temperature of 18.6 °C. The mean precipitation value was higher than normal with a monthly precipitation height of 14 mm and a monthly anomaly of 24 mm. At the time of the experiment, the ambient temperature was 16 °C, the humidity was 75%, the wind had speed 12 km/h and N direction, and the atmospheric pressure was 1018 hPa (Table 1).

## Methods

### Pre-treatment of calcined bone fragments

Following the recovery of the bones after the burning experiment, approximately 200 mg of burned bone fragments were pre-treated for carbon and oxygen isotope and FTIR-ATR analyses at the Archaeology, Environmental, and Geochemistry (AMGC) research unit at the Vrije Universiteit Brussel (VUB), Belgium, to eliminate secondary carbonates and post-burial contamination. Mechanical cleaning was performed via drilling as described by Stamatakis et al. [28], followed by chemical pretreatment following Snoeck et al. [69]. Samples underwent six 10-minute ultrasonic baths in MilliQ water, one in 1 M acetic acid (CH<sub>3</sub>COOH), and six more in MilliQ water before drying overnight at 50 °C and being crushed.

### Carbon and oxygen isotope analyses of bone apatite carbonates

For carbon and oxygen isotope analysis of bone apatite carbonates, 30 mg of bone powder (15 mg per duplicate) was processed following Stamatakis et al. [28]. The powder was placed in sealed glass tubes (exetainer® from Labco Limiter), flushed with helium to remove oxygen, and treated with phosphoric acid to extract CO<sub>2</sub>. The extracted CO<sub>2</sub> was analysed using a Nu Perspective IRMS with a Nu GasPrep bench at the Vrije Universiteit Brussel. Isotope ratios are expressed as  $\delta$  units, showing deviations from a specific standard value [70–71]. The results are reported as per mil (‰) deviation from the VPDB reference standard. International standards (IA-R022, IAEA-603, and IAEA-CO8) were used to calibrate the

isotopic values and the analytical precision was better than  $\pm 0.30\text{‰}$  ( $\delta^{13}\text{C}$ ) and  $\pm 0.40\text{‰}$  ( $\delta^{18}\text{O}$ ) based on repeated measurements of in-house cremated bone standard CBA ( $n = 15$ ; see De Winter et al. [72]).

### Fourier transform infrared spectroscopy in attenuated total reflectance mode (FTIR-ATR)

FTIR-ATR analysis was conducted on 6 mg of sieved bone powder (25–50  $\mu\text{m}$  fraction) following Stamatakis et al. [28], as this fraction provides reliable and reproducible results [73]. Each sample was analysed in triplicates ( $\sim 2\text{ mg}$  per measurement), and the reported indices are averages of the three measurements. Analyses were performed at AMGC-VUB using a Bruker Vertex 70v FTIR spectrometer (4000–400  $\text{cm}^{-1}$  range, 32 scans, 4  $\text{cm}^{-1}$  resolution) under vacuum. The crystal plate and anvil were cleaned with isopropanol after each measurement. Spectra were processed with OPUS 7.5 software and all the indices were calculated after the baseline correction (see SI of Stamatakis et al., [28]).

### Statistical tests

IBM SPSS Statistics version 29.0.1.0 was used to perform univariate and multivariate statistical tests to assess the significance of variations in measured attributes across the examined seasons. Before any statistical comparison, the Gaussian distribution was examined using the Kolmogorov-Smirnov test. As infrared and isotope variables followed a normal distribution, parametric tests including MANOVA and Independent Samples *t*-test were applied to evaluate differences among seasons. Statistical significance was set at  $p \leq 0.05$ .

To explore seasonal patterns in the archaeological samples, z-score standardised  $\delta^{13}\text{C}$  and  $\delta^{18}\text{O}$  values were compared to seasonal reference centroids using Euclidean distance. A chi-square test of independence assessed the relationship between assigned season and archaeological period. Full methodological details are provided in S1 Text File, and the dataset used is available in S2 Excel Table.

### Results and discussion

The following section presents the results of the experimental cremations, beginning with observations of burning conditions and temperature variations recorded during each seasonal experiment. These are followed by the analytical outcomes of infrared spectroscopy and carbon and oxygen isotope analyses. Figures and tables are provided to illustrate temperature trends, weather conditions, and the structural and compositional changes in samples burned across different seasons. The “Average pyre” and “Average leg” values in Table 1 represent the mean of all these recorded measurements across the burning period.

Comparing the burning process among the different seasons, it was observed that in summer, the moderate speed of the wind (24 km/h) on the day of the experiment, in combination with the high temperature of the day (26 °C), and the use of fully dried fuelwood led the temperature of the leg to reach the highest recorded temperature more quickly—within just 90 minutes after the ignition of the pyre (Fig 1). It was also noted that the temperature rose faster in summer and autumn, when the olive trunks were fully dried, compared to winter and spring, when the fuelwood was partially humid (Fig 1) [67].

Furthermore, the temperature of the day on which each experiment was performed strongly correlates with the time it takes for each leg to reach maximum temperature ( $r = 0.94$ , 95% CI: 0.75–0.95,  $p < 0.01$ ). The coefficient of determination ( $R^2$ ) indicates that 88% of the variation in time to maximum temperature is explained by the daily temperature. It seems that the higher the temperature of the day the shorter the time needed for each leg to reach its maximum temperature (Fig 2) [67]. However, the highest mean pyre (647 °C) and leg (524 °C) temperatures were recorded in spring (Table 1), even though humidity was high (75%), the wood was partially moist, and the maximum temperature was achieved 135 minutes after the ignition of the pyre (Fig 1). Surprisingly, the lowest mean pyre (595 °C) and leg (462 °C) temperatures were measured in summer and not in winter as was expected based on the weather conditions and the state of the fuelwood (Table 1). Nevertheless, in the summer experiment, the temperature reached the highest recorded temperature of all four experiments, 1040 °C, but only for a few minutes [67].



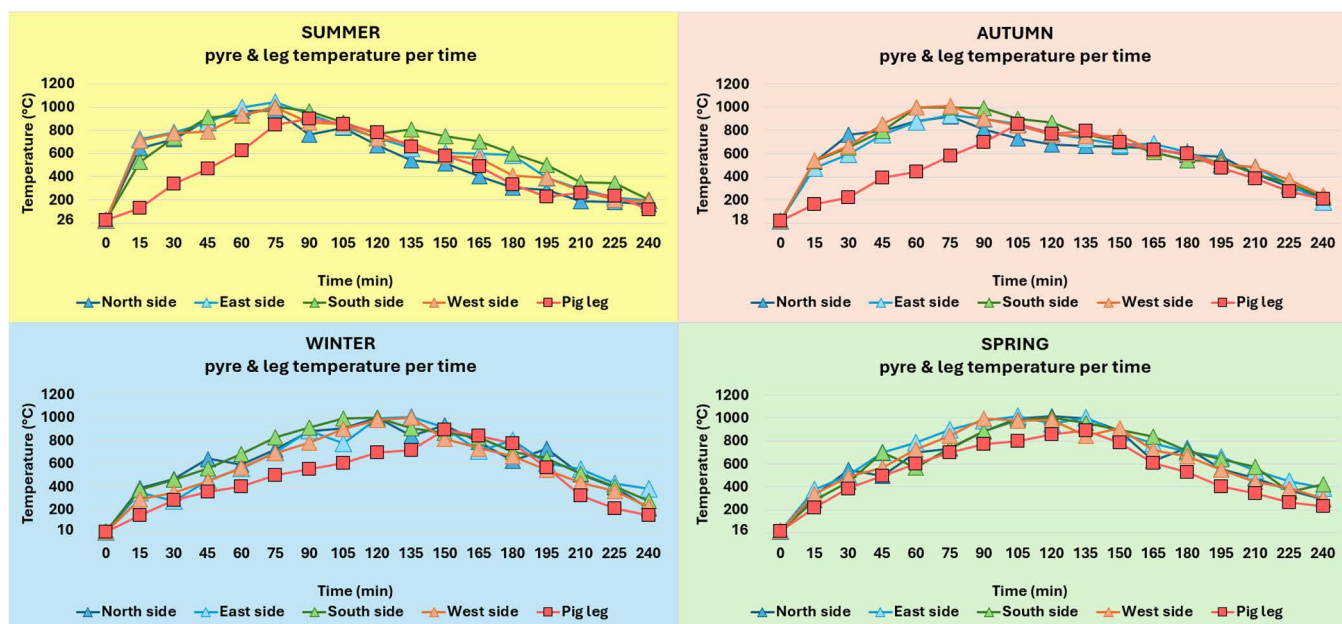

**Fig 1. Recorded pyre and leg temperatures per season.** The temperature was recorded every 15 minutes for the four sides of the pyre (N, E, S, and W sides) and the leg.

<https://doi.org/10.1371/journal.pone.0327478.g001>

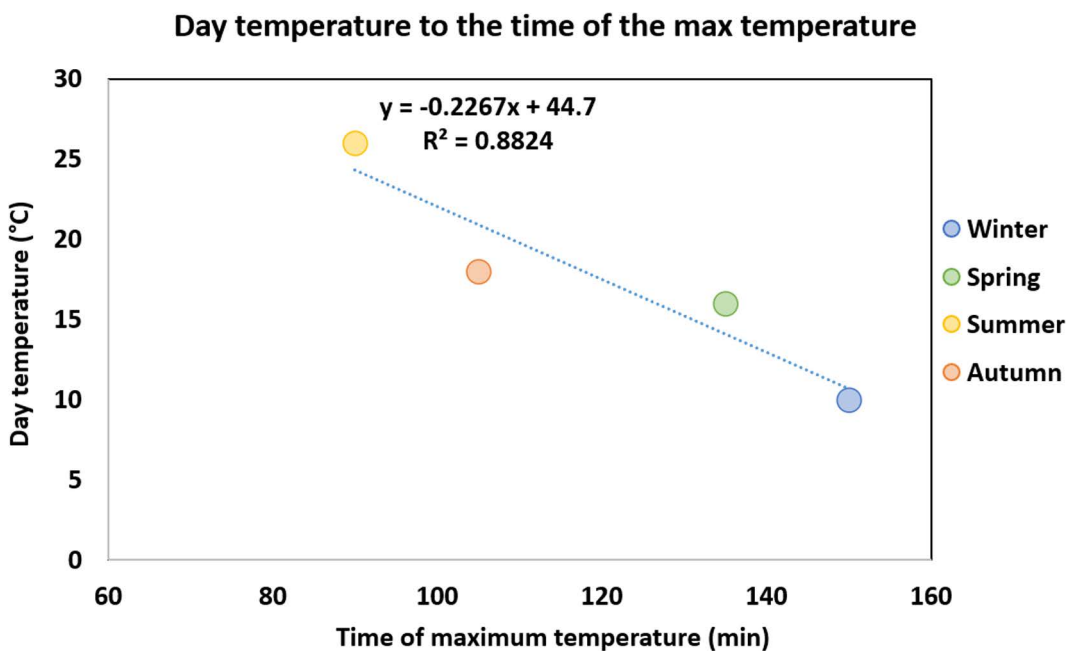

**Fig 2. Scatter plot of the temperature of the day in which each experiment was performed and the time it took for each leg to reach the maximum temperature with regression line (Pearson correlation).**

<https://doi.org/10.1371/journal.pone.0327478.g002>

Experimental research for forensic and archaeological sciences has proved that the infrared splitting factor (IRSF) to carbonyl-to-carbonate ratios (C/C) are temperature-related and they can be used as indicators for distinguishing low intensity (< 600 °C) from high intensity (> 600 °C) burnings [25,43,50,74,75]. As expected, based on the recorded mean pyre and leg temperatures, the burned pig bones from autumn and spring present higher mean IRSF and lower mean C/C ratios compared to the experimental data from summer and winter, proving that the mean burning temperature was higher in autumn and spring with the burned bones from the spring to present the highest mean temperature and the highest mean IRSF value (Fig 3, Table 2) [67]. It seems that the average temperature during combustion is more important than the maximum temperature, as it influences IRSF and C/C ratios. The difference in IRSF and C/C ratios between summer and winter, and autumn and spring are statistically significant (Independent *t*-test for IRSF: (t)24 = -1.994, *p* = 0.05, Cohen's *d* = -0.782, 95% confidence interval [-1.574, 0.025]; for C/C: (t)24 = 3.564, *p* = 0.002, Cohen's *d* = 1.389, 95%

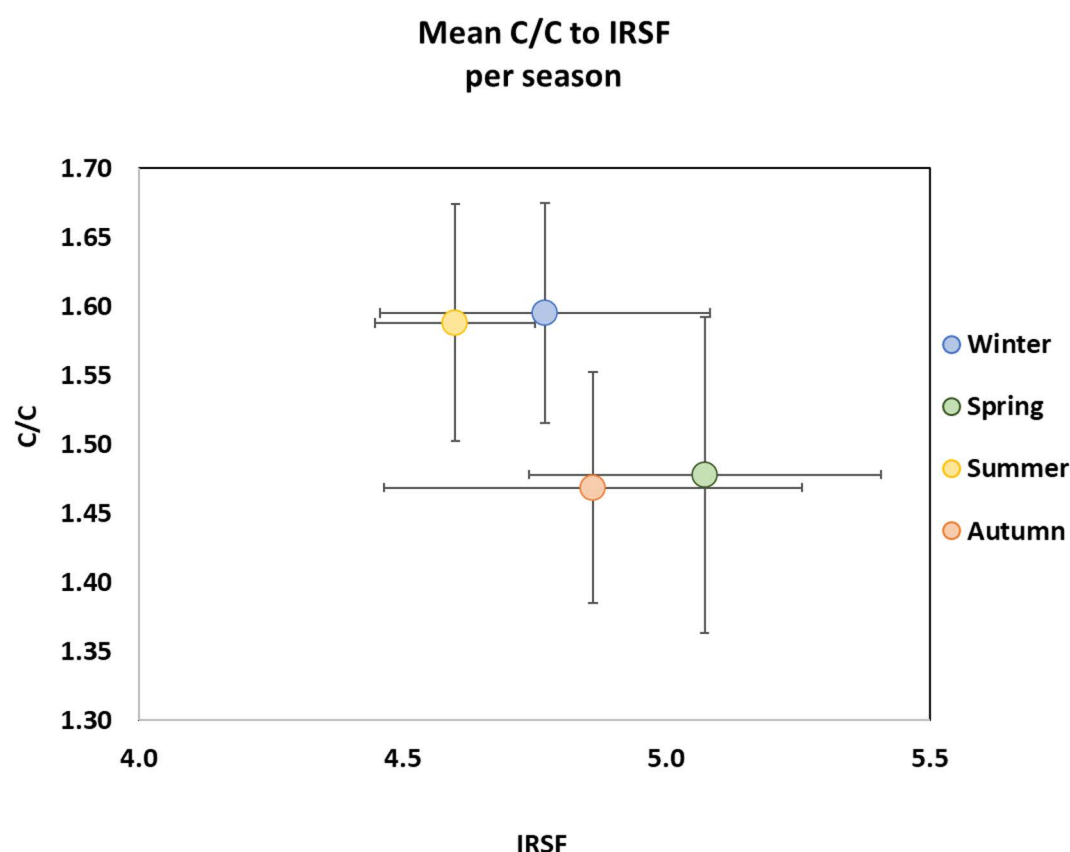

**Fig 3. C/C to IRSF of all the burned skeletal elements per season (mean  $\pm$  1 SD).**

<https://doi.org/10.1371/journal.pone.0327478.g003>

**Table 2. Mean values and standard deviations (SD) for infrared indices and  $\delta^{13}\text{C}$  and  $\delta^{18}\text{O}$  values of all the burned skeletal elements per season.**

| Season      | IRSF | SD   | C/C  | SD   | $\delta^{13}\text{C}$ (‰) | SD  | $\delta^{18}\text{O}$ (‰) | SD  |
|-------------|------|------|------|------|---------------------------|-----|---------------------------|-----|
| Winter 2023 | 4.8  | 0.31 | 1.60 | 0.08 | -24.1                     | 2.3 | -17.3                     | 1.3 |
| Spring 2023 | 5.1  | 0.33 | 1.48 | 0.11 | -23.3                     | 3.0 | -16.0                     | 1.3 |
| Summer 2022 | 4.6  | 0.15 | 1.59 | 0.09 | -23.3                     | 0.8 | -15.6                     | 1.0 |
| Autumn 2022 | 4.9  | 0.40 | 1.47 | 0.08 | -22.7                     | 1.8 | -15.3                     | 1.8 |

<https://doi.org/10.1371/journal.pone.0327478.t002>



confidence interval [0.523, 2.250]). At the beginning of the experiment, it was expected that the mean pyre and leg temperatures would be higher in summer compared to the other seasons considering that fully dried wood was used for the experimental pyre, the day temperature was relatively high (26 °C), and a moderate wind (24 km/h) facilitated the burning process. However, those expectations were not entirely met, as the mean pyre and leg temperatures in summer were lower than anticipated.

A strong linear correlation ( $R^2=0.87$ ) was also noticed between the duration for which the temperature of the legs was equal or higher than 600 °C and the mean IRSF values of the burned bones for each season (Fig 4) [67]. The Pearson correlation between the two variables is statistically significant ( $p<0.02$ ) and the 95% confidence interval for the Pearson correlation coefficient ranged from 0.77 to 0.94, indicating the strength of this relationship. It seems that IRSF is not only temperature-related, but it is also linked to the duration of high intensity burning. The season in which each experiment was performed did not seem to influence the duration of high intensity burning as indicated by the same duration (75 minutes) in which the leg temperatures were equal or higher than 600 °C in summer and winter.

Differences were not observed regarding the state of fragmentation of the studied burned skeletal remains among the different seasons. The collection of the burned bones took place approximately 24 hours after each experiment. According to the research of Waterhouse [58], an increased fragmentation has been recorded when the temperature fluctuates around 0 °C on the day of collection. It was also shown that rainy weather conditions on the day of the recovery caused increased fragmentation and when there is a delay in the collection of the skeletal remains both fluctuating temperatures and freezing conditions have also a large impact on the state of fragmentation. In the seasonality experiment, even in

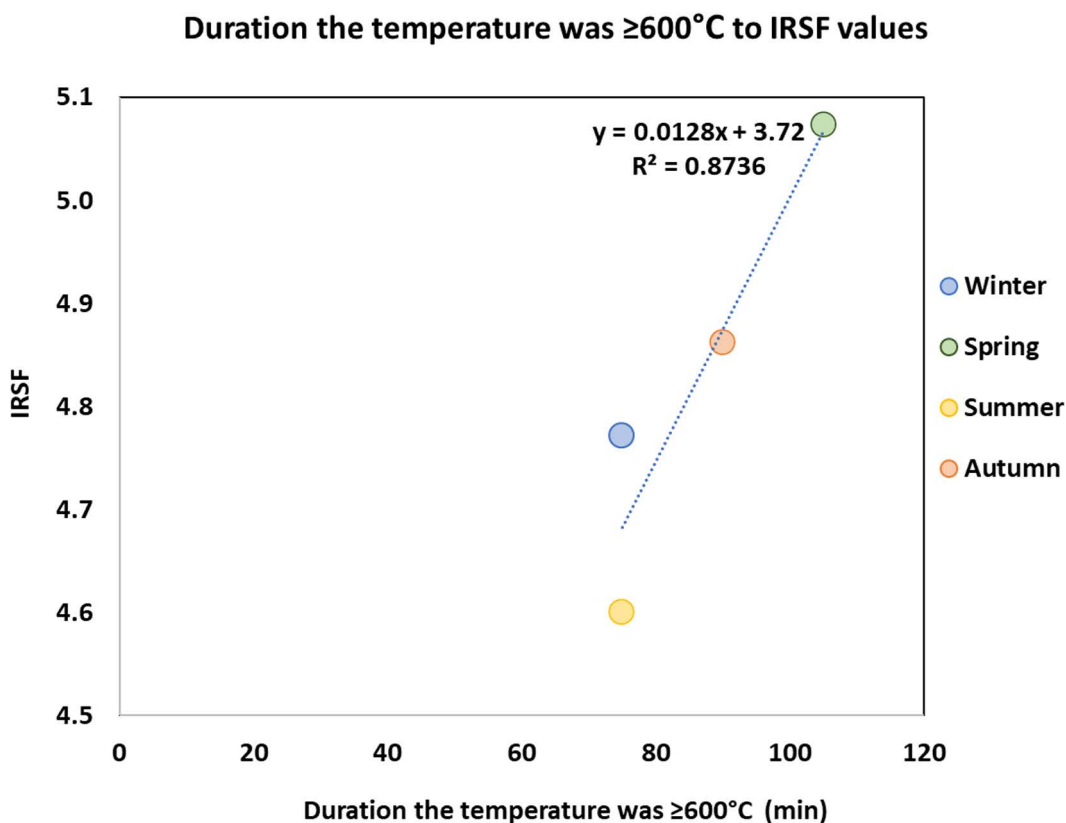

**Fig 4. Scatter plot between the duration the temperature was equal or higher than 600°C and mean IRSF ( $\pm 1$  SD) values of burned bones per season with regression line (Pearson correlation).**

<https://doi.org/10.1371/journal.pone.0327478.g004>

winter, the lowest temperature recorded on the day of the collection was 8 °C. Furthermore, the humidity was high during the experiments in winter (70%) and spring (75%), but rainy weather conditions on the day of the experiment or the day of the recovery were not observed in any experiment. As a result, the lack of freezing temperatures or rainy weather conditions, in combination with the fast collection of the skeletal remains could explain the lack of extreme cracking and fragmentation of the burned bones in this study.

Regarding the carbon and oxygen isotope results (Fig 5, Table 2) [67], a large variability can be observed in  $\delta^{13}\text{C}$  values of all the skeletal elements in spring and winter, with values ranging from  $-27.5\text{‰}$  to  $-19.7\text{‰}$  and from  $-27.1\text{‰}$  to  $-20.8\text{‰}$ , respectively. Their variability in  $\delta^{18}\text{O}$  values is smaller (spring: from  $-17.4\text{‰}$  to  $-13.9\text{‰}$ ; winter: from  $-19.1\text{‰}$  to  $-15.0\text{‰}$ ). Autumn shows smaller variability in  $\delta^{13}\text{C}$  values (from  $-24.7\text{‰}$  to  $-19.3\text{‰}$ ) compared to spring and winter, but the largest variability in  $\delta^{18}\text{O}$  values (from  $-17.7\text{‰}$  to  $-12.8\text{‰}$ ) among all the seasons. Summer has the lowest variability in both  $\delta^{13}\text{C}$  (from  $-24.8\text{‰}$  to  $-22.5\text{‰}$ ) and  $\delta^{18}\text{O}$  values (from  $-16.7\text{‰}$  to  $-16.7\text{‰}$ ). The burned skeletal remains of the winter experiment present the lowest mean  $\delta^{13}\text{C}$  and  $\delta^{18}\text{O}$  values and autumn shows the highest among all the seasons (Fig 5). The difference in  $\delta^{18}\text{O}$  values between winter and autumn is statistically significant (Independent  $t$ -test:  $t(13) = -2.432$ ,  $p = 0.03$ , Cohen's  $d = -1.259$ , 95% confidence interval  $[-2.361, -0.117]$ ) but in  $\delta^{13}\text{C}$  values is not (Independent  $t$ -test:  $t(13) = -1.251$ ,  $p = 0.23$ , Cohen's  $d = -0.647$ , 95% confidence interval  $[-1.679, 0.408]$ ). A MANOVA test further proved the difference in  $\delta^{13}\text{C}$  and  $\delta^{18}\text{O}$  values between winter and the other three seasons ( $p = 0.002$ , Pillai's Trace value = 0.41677). Furthermore, a strong linear correlation ( $R^2 = 0.92$ ) was observed between the mean  $\delta^{13}\text{C}$  and  $\delta^{18}\text{O}$  values of all the burned skeletal

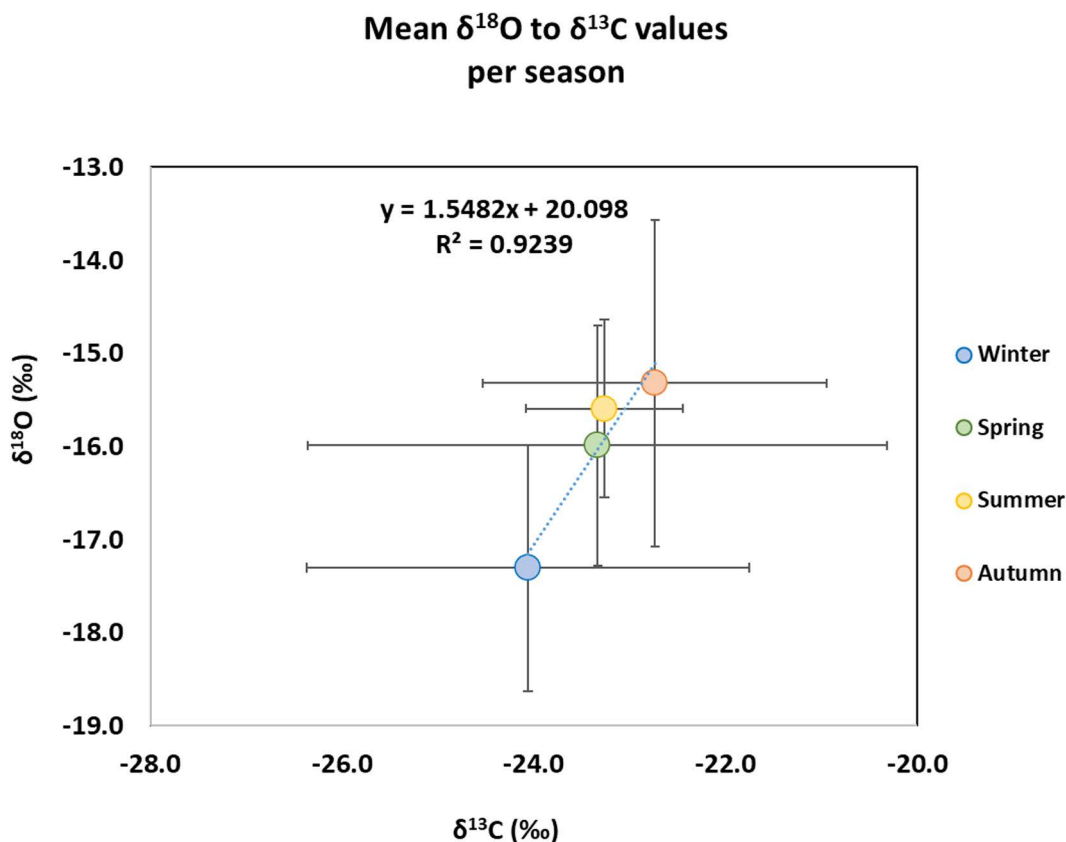

**Fig 5.**  $\delta^{18}\text{O}$  to  $\delta^{13}\text{C}$  values of all the burned skeletal elements per season (mean  $\pm$  1 SD).

<https://doi.org/10.1371/journal.pone.0327478.g005>

elements (Fig 5). This correlation is statistically significant ( $p < 0.01$ ) and the 95% confidence interval for the Pearson correlation coefficient ranged from 0.83 to 0.97, further supporting the strength of this relationship.

The atmospheric pressure (hPa) of the day each experiment was performed strongly affected the mean  $\delta^{13}\text{C}$  and  $\delta^{18}\text{O}$  values (Figs 6A and 6B): the lower the atmospheric pressure, the lower the mean  $\delta^{13}\text{C}$  and  $\delta^{18}\text{O}$  values. These mean  $\delta^{13}\text{C}$  and  $\delta^{18}\text{O}$  values were also affected by the mean monthly precipitation height of the region, but to a lesser extent (Figs 7A and 7B): the higher the mean monthly precipitation, the lower the mean  $\delta^{13}\text{C}$  and  $\delta^{18}\text{O}$  values of the burned bones. These relationship could probably explain the difference in mean  $\delta^{18}\text{O}$  values between the experiment that was conducted in autumn, in a day with high atmospheric pressure (1022 hPa) and with low mean monthly precipitation height (9mm with monthly anomaly  $-6\text{mm}$ ) with the experiment that was performed in winter, in a day with low air pressure (1013 hPa) and high mean precipitation height (62mm with monthly anomaly 10mm). From the beginning of the seasonality experiment, it was expected that humidity would also affect the  $\delta^{18}\text{O}$  values among the different seasons but a relationship between the humidity on the day of the experiment and the  $\delta^{18}\text{O}$  values was not observed, as it was noticed between the  $\delta^{18}\text{O}$  values and the monthly precipitation height.

To assess whether it is possible to determine the season in which cremation was performed in past societies, the mean  $\delta^{13}\text{C}$  and  $\delta^{18}\text{O}$  values from the experimental data were compared with the only available archaeological  $\delta^{13}\text{C}$  and  $\delta^{18}\text{O}$  data from the Late Bronze Age (LBA)/ Early Iron Age (EIA) [28] and Gallo-Roman cremations [76–77] from Belgium (Fig 8, Table 3). In Stamataki et al. (76–77), it was shown that the Gallo-Roman cemeteries present more enriched  $\delta^{13}\text{C}$  and  $\delta^{18}\text{O}$  values compared to the LBA/EIA cemeteries, except for the cemetery of Fouches. This suggests that the Gallo-Roman cremations likely had better oxygen availability during combustion, which could be related to factors such as the pyre structure (i.e., lower oxygen to fuel ratio), the pyre's location in the environment (e.g., on hill vs in a pit), the methods used to extinguish the pyre after burning (e.g., natural cool down vs use of water/wine to extinguish the pyre), and the season and weather conditions during cremation (e.g., cremations performed in months with low atmospheric pressure and high precipitation, such as winter, vs those with high atmospheric pressure and low precipitation, such as summer).

The comparison between the mean  $\delta^{13}\text{C}$  and  $\delta^{18}\text{O}$  values of the experimental and archaeological samples demonstrates that the Gallo-Roman cremated remains exhibit high variability in mean  $\delta^{13}\text{C}$  and  $\delta^{18}\text{O}$  values, spanning a wide range across multiple seasons (winter, spring, summer, and autumn), suggesting that cremations likely occurred throughout the year. In contrast, the LBA/EIA cremated remains show lower variability in mean  $\delta^{13}\text{C}$  and  $\delta^{18}\text{O}$  values compared to the Gallo-Roman samples, clustering around the range observed in the winter experimental data (Fig 8, Table 3). To

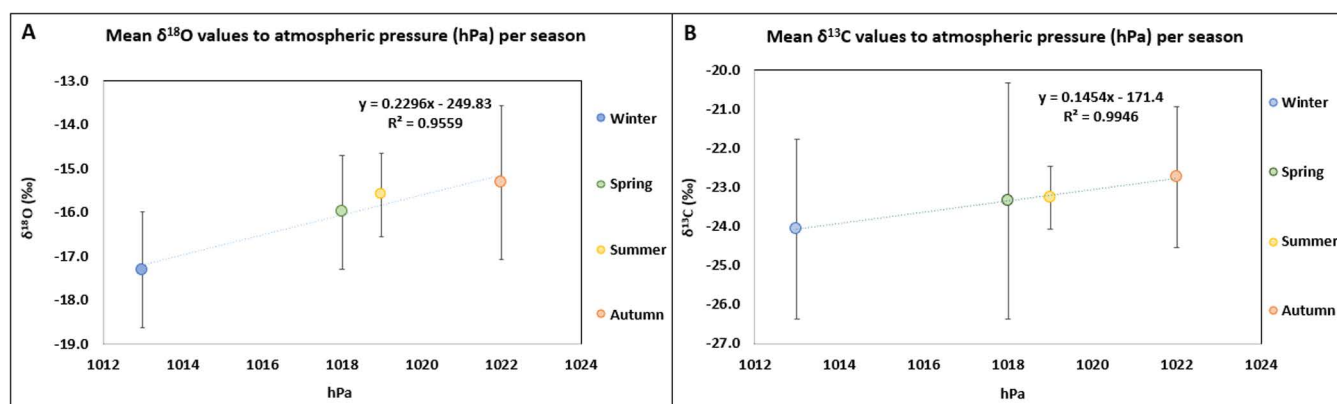

**Fig 6. A) Scatter plot between atmospheric pressure (hPa) and mean  $\delta^{18}\text{O}$  values ( $\pm 1$  SD) per season with regression line (Pearson correlation:  $R^2 = 0.96$ ; 95% confidence interval ranged from 0.90 to 0.98). B) Scatter plot between atmospheric pressure (hPa) and mean  $\delta^{13}\text{C}$  values ( $\pm 1$  SD) per season with regression line (Pearson correlation:  $R^2 = 0.99$ ; 95% confidence interval ranged from 0.98 to 0.99).**

<https://doi.org/10.1371/journal.pone.0327478.g006>

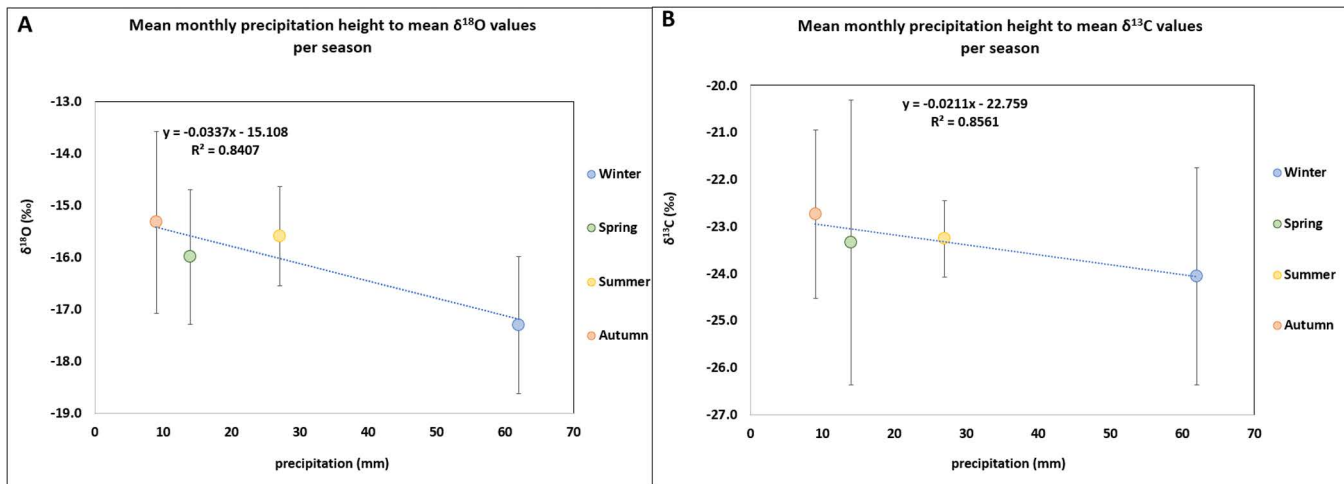

**Fig 7. A)** Scatter plot between mean monthly precipitation height (mm) of the region and mean  $\delta^{18}\text{O}$  values ( $\pm 1$  SD) per season with regression line (Pearson correlation:  $R^2=0.84$ ; 95% confidence interval ranged from 0.67 to 0.93). **B)** Scatter plot between mean monthly precipitation height (mm) of the region and mean  $\delta^{13}\text{C}$  values ( $\pm 1$  SD) per season with regression line (Pearson correlation:  $R^2=0.86$ ; 95% confidence interval ranged from 0.70 to 0.93).

<https://doi.org/10.1371/journal.pone.0327478.g007>

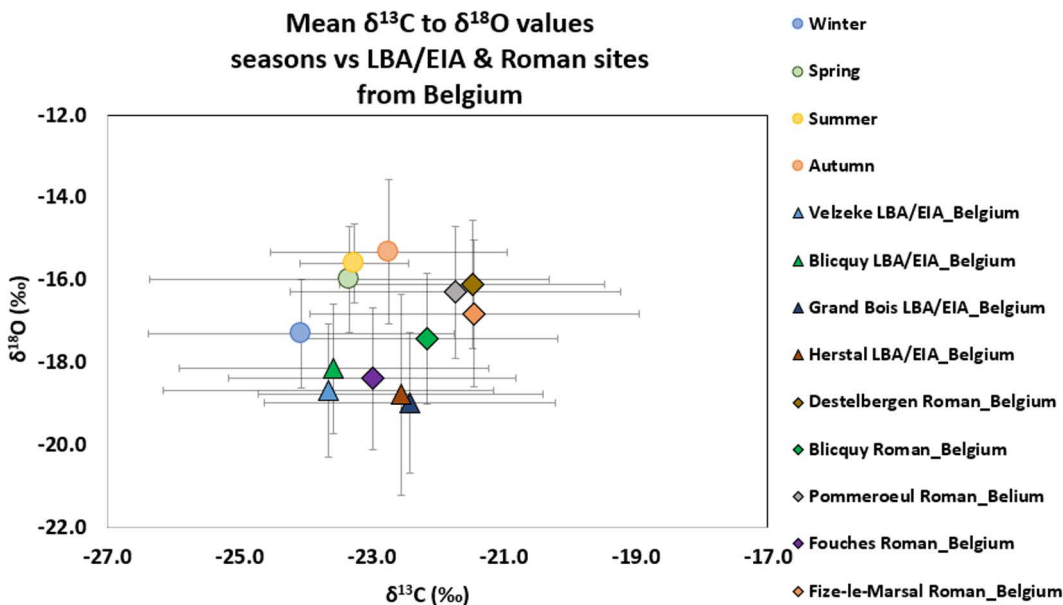

**Fig 8.** Mean  $\delta^{18}\text{O}$  to  $\delta^{13}\text{C}$  values ( $\pm 1$  SD) of all the burned skeletal elements per season (this study) and the archaeological cremated bones from the LBA/EIA [28] and Roman period [77] from Belgium.

<https://doi.org/10.1371/journal.pone.0327478.g008>

further support this observation, the Euclidean distance between each archaeological sample and the mean values ( $\delta^{13}\text{C}$  and  $\delta^{18}\text{O}$ ) of every season was calculated, and each sample was assigned to the closest season (winter, autumn, spring, summer) (see S1 Text for methodology and S2 Excel Table). Additionally, a chi-square test of independence with Yates' continuity correction, using all the infrared and isotopic data, was conducted to examine the relationship between the LBA/

**Table 3. Mean values and standard deviations (SD) for infrared indices and  $\delta^{13}\text{C}$  and  $\delta^{18}\text{O}$  values of all the burned skeletal elements from the LBA/EIA (\* [28]) and Roman sites (\*\* [77]) from Belgium.**

|                        | Mean Carbon ( $\delta^{13}\text{C}$ ‰) | SD  | Mean Oxygen ( $\delta^{18}\text{O}$ ‰) | SD  |
|------------------------|----------------------------------------|-----|----------------------------------------|-----|
| Velzeke LBA/EIA*       | -23.6                                  | 2.5 | -18.7                                  | 1.6 |
| Blicquy LBA/EIA*       | -23.6                                  | 2.3 | -18.2                                  | 1.6 |
| Grand Bois LBA/EIA*    | -22.4                                  | 2.2 | -19.0                                  | 1.7 |
| Herstal LBA/EIA*       | -22.6                                  | 2.2 | -18.8                                  | 2.4 |
| Destelbergen Roman**   | -21.5                                  | 2.0 | -16.1                                  | 1.6 |
| Blicquy Roman**        | -22.2                                  | 2.0 | -17.4                                  | 1.6 |
| Pommeroeul Roman**     | -21.7                                  | 2.5 | -16.3                                  | 1.6 |
| Fouches Roman**        | -23.0                                  | 2.2 | -18.4                                  | 1.7 |
| Fize-le-Marsal Roman** | -21.4                                  | 2.5 | -16.8                                  | 1.8 |

<https://doi.org/10.1371/journal.pone.0327478.t003>

EIA and Roman period and the distribution across the different seasons. The chi-square test indicates that the distribution of seasons between the LBA/EIA and Roman period is significantly different ( $\chi^2=63.531$ ,  $p<0.00$ ).

It is acknowledged that the seasonality experiment was conducted in modern-day Greece, while the archaeological data are derived from prehistoric and Roman-period Belgium. This introduces potential bias due to differences in climate, fuel types, and local environmental conditions. Furthermore, the present study included only one experimental cremation per season, and as such, these comparisons should be interpreted as tentative hypotheses, not definitive conclusions. Repeated experiments under a wider range of environmental and burning conditions are necessary to further explore how burning locations and weather conditions affect cremation settings.

Within these limitations, exploratory interpretations can be considered regarding why the LBA/EIA cremations were likely performed in winter or under winter-like weather conditions. One explanation may involve higher mortality rates during winter, a season often associated with increased illness due to harsher weather, food scarcity, and lower nutritional quality, which can weaken immune systems and increase vulnerability to diseases [78–79]. This seasonal peak in mortality might result in more cremations being performed during winter months.

Practical reasons may also explain why Belgian LBA/EIA cremations were likely performed in winter. Cremation requires significant amounts of fuelwood (200 to 600 kilograms) based on ethnographic information from Hindu cremations [80–81]. In agricultural societies, wood may have been more readily available for funerary practices during the winter, having been stockpiled for both heating and cremation purposes. Additionally, cremation is a time-consuming process that likely requires community involvement, so it would make sense to perform these rites in winter when there were fewer demands on agricultural activities such as planting and harvesting [82]. During periods of harvest or planting, people were likely more dispersed, working in the fields or tending livestock, whereas in winter, it was probably easier for people to stay close to their settlements and to organise and participate in funerary rituals. By contrast, in the Roman period, cremation practices may have been performed across a wider range of seasons indicating probably more organised funerary practices and/or the availability of fuelwood year-round.

Furthermore, historical written sources also offer valuable context regarding the timing of cremations. For example, Wulfstan's 9th-century account of the Aesti tribe (from the southeastern coast of the Baltic Sea) describes a prolonged interval between death and cremation, during which the body was kept cool to prevent decomposition and elaborate rituals such as feasting and gambling took place [83]. While this does not directly indicate a seasonal preference, it suggests that cremations could be delayed intentionally—potentially leading to seasonal patterns, especially in colder climates where natural refrigeration made long delays more feasible. Although this text originates from the early medieval period and a different cultural context, it highlights how environmental conditions and cultural practices could interact to shape the timing of cremation.

In this light, the winter cremation pattern observed in LBA/EIA Belgium could also have been influenced by a combination of environmental constraints and cultural choices. While the evidence does not point to a deliberate preference for winter cremation, practical and environmental considerations—such as ease of body preservation and fuel availability—could have contributed to the concentration of cremations during colder months. Incorporating such perspectives underscores the complexity of interpreting seasonality in cremation practices and supports the need for multidisciplinary approaches that combine archaeological, environmental, and textual evidence.

In conclusion, this study offers preliminary evidence that carbon and oxygen isotope analysis on bioapatite can be used for investigating the season in which cremation was performed, as both  $\delta^{13}\text{C}$  and  $\delta^{18}\text{O}$  values are affected by the atmospheric pressure and precipitation. However, more experimental research in different geographical areas with different altitudes and weather conditions is important for further investigating how the location in which burning was performed in combination with the weather conditions affected the cremation settings.

## Conclusion

This preliminary study highlights the significant impact of seasons and weather conditions on cremation processes, as investigated through experimental archaeology and state-of-the-art analytical techniques on burned remains. The findings underscore the important role of day temperature and the state of fuelwood during the experiments in achieving maximum burning temperatures more quickly. Dry fuelwood and elevated day temperatures facilitate the burning process. However, monthly precipitation emerged as a critical factor, consistently reducing burning temperatures regardless of the fuelwood's condition.

Higher burning temperatures were observed during autumn and spring, as evidenced by both recorded temperatures and infrared indices (IRSF to C/C), suggesting a higher-intensity burning processes during these seasons. Moreover, the results highlight that IRSF values are influenced not only by temperature but also by the duration of high-intensity burning.

Fragmentation of the burned skeletal remains was uniform across all experiments, with no significant differences observed. This consistency is likely attributed to the absence of freezing temperatures or rainy weather conditions during the experiments and the collection of skeletal remains after burning.

Furthermore, atmospheric pressure and monthly precipitation levels were found to significantly influence the isotopic ( $\delta^{13}\text{C}$  and  $\delta^{18}\text{O}$ ) values of the burned bones indicating that carbon and oxygen isotope analysis on bioapatite can be used for investigating in which season cremation was performed. Comparisons with archaeological data from Belgium reveal potential seasonal patterns in past cremation practices. These results underline the complexity of understanding the season in which cremations were performed and underscore the need for expanded experimental research in various geographical areas with different altitudes and weather conditions to further investigate how the location in which burning was performed in combination with the weather conditions affected the cremation settings and therefore the past funerary practices.

## Supporting information

**S1 File. Description of the Euclidean distance method used to assign archaeological samples to seasonal reference groups, including statistical analysis and results.**

(XLSX)

**S1 Table. Contingency table with assigned seasonal values for archaeological observations.**

(DOCX)

**S2 Table. Euclidean distance result data table (Excel file).**

(XLSX)



**S3 File. Inclusivity in global research questionnaire.**  
(DOCX)

## Acknowledgments

We thank the butchery '*CHOIROTROFEIA MARTINOUE LTD*' for donating the four pig legs for the seasonality experiments, and Konstantinos Stamatakis and Chrisanthi Rousi for donating and providing the olive tree wood. We are grateful to David Verstraeten and Philip Claeys (AMGC Research Unit, VUB) for their assistance with the stable isotope analysis.

## Author contributions

**Conceptualization:** Elisavet Stamataki, Christophe Snoeck.

**Data curation:** Elisavet Stamataki.

**Formal analysis:** Elisavet Stamataki.

**Funding acquisition:** Elisavet Stamataki.

**Investigation:** Elisavet Stamataki.

**Methodology:** Elisavet Stamataki.

**Project administration:** Elisavet Stamataki.

**Resources:** Elisavet Stamataki.

**Supervision:** Guy De Mulder, Martine Vercauteren, Christophe Snoeck.

**Validation:** Elisavet Stamataki.

**Visualization:** Elisavet Stamataki, Rosalie Hermans.

**Writing – original draft:** Elisavet Stamataki.

**Writing – review & editing:** Guy De Mulder, Rosalie Hermans, Martine Vercauteren, Christophe Snoeck.

## References

1. Capuzzo G, Snoeck C, Boudin M, Dalle S, Annaert R, De Mulder G, et al. Cremation vs inhumation, modelling cultural changes in funerary practices from the Mesolithic to the Middle Ages in Belgium using Kernel Density Analysis on 14C data. *Radiocarbon*. 2020;62(6):1809–32. <https://doi.org/10.1017/rdc.2020.88>
2. Shipman P, Foster G, Schoeninger M. Burnt bones and teeth: an experimental study of color, morphology, crystal structure and shrinkage. *Journal of Archaeological Science*. 1984;11(4):307–25. [https://doi.org/10.1016/0305-4403\(84\)90013-x](https://doi.org/10.1016/0305-4403(84)90013-x)
3. Stiner MC, Kuhn SL, Weiner S, Bar-Yosef O. Differential Burning, Recrystallization, and Fragmentation of Archaeological Bone. *Journal of Archaeological Science*. 1995;22(2):223–37. <https://doi.org/10.1006/jasc.1995.0024>
4. DeHaan JD. Fire and bodies. In: Schmidt CW, Symes SA, editors. *The analysis of burned human remains*. London, UK: Elsevier Ltd; 2008.
5. Thompson T. Fire and the body: Fire and the people. In Thompson T, editor *The archaeology of cremation*. Burned human remains in funerary studies. Oxbow books, Oxford, UK, 2015a. p. 1–15. <https://doi.org/10.1016/B978-0-12-800451-7.00001-2>
6. Thompson T. The Analysis of Heat-Induced Crystallinity Change in Bone. In Thompson T, editor. *The archaeology of cremation*. Burned human remains in funerary studies. Oxbow books, Oxford, UK; 2015b. 323–37. <https://doi.org/10.1016/B978-0-12-800451-7.00018-8>
7. McKinley JI. Spong Hill Part VIII: The Cremations. *East Anglian Archaeology* 69, East Dereham, Norfolk. 1994.
8. McKinley JI. Bone Fragment Size in British Cremation Burials and its Implications for Pyre Technology and Ritual. *Journal of Archaeological Science*. 1994;21(3):339–42. <https://doi.org/10.1006/jasc.1994.1033>
9. McKinley JI. Bronze Age 'Barrows' and Funerary Rites and Rituals of Cremation. *Proc Prehist Soc*. 1997;63:129–45. <https://doi.org/10.1017/s0079497x00002401>
10. Ubelaker D, Rife JL. The practice of cremation in the Roman-era cemetery at Kenchreai, Greece. The perspective from archeology and forensic science. *Bioarchaeology of the Near East*. 2007;1:35–57.

11. Gonçalves D, Thompson TJU, Cunha E. Osteometric sex determination of burned human skeletal remains. *J Forensic Leg Med*. 2013;20(7):906–11. <https://doi.org/10.1016/j.jflm.2013.07.003> PMID: [24112343](https://pubmed.ncbi.nlm.nih.gov/24112343/)
12. Silva FC, Márquez Pérez J, Rosa J, Santos AL. Health care and survival of a child with cranial trauma at Augusta Emerita (Mérida, Spain). In: Michaelides D, editor. *Medicine and Healing in the Ancient Mediterranean*. Oxford: Oxbow Books. 2014. p. 218–22.
13. Hlad M, Veselka B, Steadman DW, Herregods B, Elskens M, Annaert R, et al. Revisiting metric sex estimation of burnt human remains via supervised learning using a reference collection of modern identified cremated individuals (Knoxville, USA). *Am J Phys Anthropol*. 2021;175(4):777–93. <https://doi.org/10.1002/ajpa.24270> PMID: [33720412](https://pubmed.ncbi.nlm.nih.gov/33720412/)
14. Veselka B, Hlad M, Wolfe Steadman D, Annaert H, Boudin M, Capuzzo G, et al. Estimating age-at-death in burnt adult human remains using the Falys-Prangle method. *Am J Phys Anthropol*. 2021;175(1):128–36. <https://doi.org/10.1002/ajpa.24210> PMID: [33381868](https://pubmed.ncbi.nlm.nih.gov/33381868/)
15. Schulting R, Snoeck C, Gilmour N. Strontium isotope analysis of the Mesolithic cremation from Langford, Essex, England. *Mesolithic Miscellany*. 2016;24(1):19–21.
16. Snoeck C, Pouncett J, Ramsey G, Meighan IG, Mattielli N, Goderis S, et al. Mobility during the neolithic and bronze age in northern Ireland explored using strontium isotope analysis of cremated human bone. *Am J Phys Anthropol*. 2016;160(3):397–413. <https://doi.org/10.1002/ajpa.22977> PMID: [27061584](https://pubmed.ncbi.nlm.nih.gov/27061584/)
17. Snoeck C, Pouncett J, Claeys P, Goderis S, Mattielli N, Parker Pearson M, et al. Strontium isotope analysis on cremated human remains from Stonehenge support links with west Wales. *Sci Rep*. 2018;8(1):10790. <https://doi.org/10.1038/s41598-018-28969-8> PMID: [30072719](https://pubmed.ncbi.nlm.nih.gov/30072719/)
18. Sabaux C, Veselka B, Capuzzo G, Snoeck C, Sengeløv A, Hlad M, et al. Multi-proxy analyses reveal regional cremation practices and social status at the Late Bronze Age site of Herstal, Belgium. *Journal of Archaeological Science*. 2021;132:105437. <https://doi.org/10.1016/j.jas.2021.105437>
19. Veselka B, Snoeck C. Interglobular dentine attributed to vitamin D deficiency visible in cremated human teeth. *Sci Rep*. 2021;11(1):20958. <https://doi.org/10.1038/s41598-021-00380-w> PMID: [34697324](https://pubmed.ncbi.nlm.nih.gov/34697324/)
20. Dalle S, Snoeck C, Sengeløv A, Salesse K, Hlad M, Annaert R, et al. Strontium isotopes and concentrations in cremated bones suggest an increased salt consumption in Gallo-Roman diet. *Sci Rep*. 2022;12(1):9280. <https://doi.org/10.1038/s41598-022-12880-4> PMID: [35660749](https://pubmed.ncbi.nlm.nih.gov/35660749/)
21. Kootker LM, van der Velde HM, Heeren S. A triple isotope approach (Sr–O–C) to assess human mobility dynamics in the Lower Germanic limes borderscape (40–470 CE). *Journal of Archaeological Science: Reports*. 2022;44:103520. <https://doi.org/10.1016/j.jasrep.2022.103520>
22. De Coster M, Ammer S, Laning T, Kootker LM. The Relevance of Sr–O–C Isotope Analysis on Burnt Human Skeletal Remains in Archeological and Forensic Contexts: A Review and Future Directions. *WIREs Forensic Science*. 2024;6(5). <https://doi.org/10.1002/wfs2.1524>
23. Gonçalves D, Thompson TJU, Cunha E. Implications of heat-induced changes in bone on the interpretation of funerary behaviour and practice. *Journal of Archaeological Science*. 2011;38(6):1308–13. <https://doi.org/10.1016/j.jas.2011.01.006>
24. Squires KE, Thompson TJU, Islam M, Chamberlain A. The application of histomorphometry and Fourier Transform Infrared Spectroscopy to the analysis of early Anglo-Saxon burned bone. *Journal of Archaeological Science*. 2011;38(9):2399–409. <https://doi.org/10.1016/j.jas.2011.04.025>
25. Snoeck C, Brock F, Schulting RJ. Carbon Exchanges between Bone Apatite and Fuels during Cremation: Impact on Radiocarbon Dates. *Radiocarbon*. 2014;56(2):591–602. <https://doi.org/10.2458/56.17454>
26. Snoeck C, Capuzzo G, Veselka B, Salesse K, Kontopoulos I, Annaert R, et al. Unravelling the mysteries hidden within the cremated human remains from Belgium – The interdisciplinary CRUMBEL project. In: Rose HA, Christensen L, Louwen A, editors. *Beyond Urnfields - New Perspectives on Late Bronze Age – Early Iron Age Funerary Practices in Northwest Europe*. Verlag Ludwig. 2024. p. 271–88.
27. Thompson TJU, Szigeti J, Gowland RL, Witcher RE. Death on the frontier: Military cremation practices in the north of Roman Britain. *Journal of Archaeological Science: Reports*. 2016;10:828–36. <https://doi.org/10.1016/j.jasrep.2016.05.020>
28. Stamatakis E, Kontopoulos I, Salesse K, McMillan R, Veselka B, Sabaux C, et al. Is it hot enough? A multi-proxy approach shows variations in cremation conditions during the Metal Ages in Belgium. *Journal of Archaeological Science*. 2021;136:105509. <https://doi.org/10.1016/j.jas.2021.105509>
29. Surovell TA. Radiocarbon dating of bone apatite by step heating. *Geoarchaeology*. 2000;15(6):591–608. [https://doi.org/10.1002/1520-6548\(200008\)15:6<591::aid-gea7>3.0.co;2-k](https://doi.org/10.1002/1520-6548(200008)15:6<591::aid-gea7>3.0.co;2-k)
30. Van Strydonck M, Boudin M, Hoefkens M, De Mulder G. 14C-dating of cremated bones, why does it work?. *Lunula*. 2005;13:3–10.
31. Strydonck MV, Boudin M, Mulder GD. The Carbon Origin of Structural Carbonate in Bone Apatite of Cremated Bones. *Radiocarbon*. 2010;52(2):578–86. <https://doi.org/10.1017/s0033822200045616>
32. Van Strydonck M, Decq L, den Brande TV, Boudin M, Ramis D, Borms H, et al. The Protohistoric ‘Quicklime Burials’ from the Balearic Islands: Cremation or Inhumation. *Intl J of Osteoarchaeology*. 2013;25(4):392–400. <https://doi.org/10.1002/oa.2307>
33. Munro LE, Longstaffe FJ, White CD. Burning and boiling of modern deer bone: Effects on crystallinity and oxygen isotope composition of bioapatite phosphate. *Palaeogeography, Palaeoclimatology, Palaeoecology*. 2007;249(1–2):90–102. <https://doi.org/10.1016/j.palaeo.2007.01.011>
34. Munro LE, Longstaffe FJ, White CD. Effects of heating on the carbon and oxygen-isotope compositions of structural carbonate in bioapatite from modern deer bone. *Palaeogeography, Palaeoclimatology, Palaeoecology*. 2008;266(3–4):142–50. <https://doi.org/10.1016/j.palaeo.2008.03.026>
35. Olsen J, Heinemeier J, Bennike P, Krause C, Margrethe Hornstrup K, Thrane H. Characterisation and blind testing of radiocarbon dating of cremated bone. *Journal of Archaeological Science*. 2008;35(3):791–800. <https://doi.org/10.1016/j.jas.2007.06.011>

36. Olsen J, Heinemeier J, Hornstrup KM, Bennike P, Thrane H. 'Old wood' effect in radiocarbon dating of prehistoric cremated bones?. *Journal of Archaeological Science*. 2013;40(1):30–4. <https://doi.org/10.1016/j.jas.2012.05.034>
37. Zazzo A, Saliège J-F, Person A, Boucher H. Radiocarbon Dating of Calcined Bones: Where Does the Carbon Come from?. *Radiocarbon*. 2009;51(2):601–11. <https://doi.org/10.1017/s0033822200055958>
38. Zazzo A, Saliège J-F, Lebon M, Lepetz S, Moreau C. Radiocarbon Dating of Calcined Bones: Insights from Combustion Experiments Under Natural Conditions. *Radiocarbon*. 2012;54(3–4):855–66. <https://doi.org/10.1017/s0033822200047500>
39. Zazzo A, Lebon M, Chiotti L, Comby C, Delqué-Količ E, Nespoulet R, et al. Can we Use Calcined Bones for  $^{14}\text{C}$  Dating the Paleolithic?. *Radiocarbon*. 2013;55(3):1409–21. <https://doi.org/10.1017/s0033822200048347>
40. Hüls CM, Erlenkeuser H, Nadeau M-J, Grootes PM, Andersen N. Experimental Study on the Origin of Cremated Bone Apatite Carbon. *Radiocarbon*. 2010;52(2):587–99. <https://doi.org/10.1017/s0033822200045628>
41. Snoeck C, Brock F, Schulting RJ. Carbon Exchanges between Bone Apatite and Fuels during Cremation: Impact on Radiocarbon Dates. *Radiocarbon*. 2014;56(2):591–602. <https://doi.org/10.2458/56.17454>
42. Salesse K, Stamatakis E, Kontopoulos I, Verly G, Annaert R, Boudin M, et al. These boots are made for burnin': Inferring the position of the corpse and the presence of leather footwears during cremation through isotope ( $\delta^{13}\text{C}$ ,  $\delta^{18}\text{O}$ ) and infrared (FTIR) analyses of experimentally burnt skeletal remains. *PLoS One*. 2021;16(10):e0257199. <https://doi.org/10.1371/journal.pone.0257199> PMID: [34644308](https://pubmed.ncbi.nlm.nih.gov/34644308/)
43. Thompson TJU, Gauthier M, Islam M. The application of a new method of Fourier Transform Infrared Spectroscopy to the analysis of burned bone. *Journal of Archaeological Science*. 2009;36(3):910–4. <https://doi.org/10.1016/j.jas.2008.11.013>
44. Thompson TJU, Islam M, Piduru K, Marcel A. An investigation into the internal and external variables acting on crystallinity index using Fourier Transform Infrared Spectroscopy on unaltered and burned bone. *Palaeogeography, Palaeoclimatology, Palaeoecology*. 2011;299(1–2):168–74. <https://doi.org/10.1016/j.palaeo.2010.10.044>
45. Thompson TJU, Islam M, Bonniere M. A new statistical approach for determining the crystallinity of heat-altered bone mineral from FTIR spectra. *Journal of Archaeological Science*. 2013;40(1):416–22. <https://doi.org/10.1016/j.jas.2012.07.008>
46. Lebon M, Reiche I, Bahain J-J, Chadeaux C, Moigne A-M, Fröhlich F, et al. New parameters for the characterization of diagenetic alterations and heat-induced changes of fossil bone mineral using Fourier transform infrared spectrometry. *Journal of Archaeological Science*. 2010;37(9):2265–76. <https://doi.org/10.1016/j.jas.2010.03.024>
47. Ellingham STD, Thompson TJU, Islam M, Taylor G. Estimating temperature exposure of burnt bone - A methodological review. *Sci Justice*. 2015;55(3):181–8. <https://doi.org/10.1016/j.scijus.2014.12.002> PMID: [25934370](https://pubmed.ncbi.nlm.nih.gov/25934370/)
48. Ellingham STD, Thompson TJU, Islam M. The Effect of Soft Tissue on Temperature Estimation from Burnt Bone Using Fourier Transform Infrared Spectroscopy. *J Forensic Sci*. 2016;61(1):153–9. <https://doi.org/10.1111/1556-4029.12855> PMID: [26275238](https://pubmed.ncbi.nlm.nih.gov/26275238/)
49. Gonçalves D, Vassalo AR, Makhoul C, Piga G, Mamede AP, Parker SF, et al. Chemosteometric regression models of heat exposed human bones to determine their pre-burnt metric dimensions. *Am J Phys Anthropol*. 2020;173(4):734–47. <https://doi.org/10.1002/ajpa.24104> PMID: [32722856](https://pubmed.ncbi.nlm.nih.gov/32722856/)
50. Marques MPM, Gonçalves D, Mamede AP, Coutinho T, Cunha E, Kockelmann W, et al. Profiling of human burned bones: oxidising versus reducing conditions. *Sci Rep*. 2021;11(1):1361. <https://doi.org/10.1038/s41598-020-80462-3> PMID: [33446708](https://pubmed.ncbi.nlm.nih.gov/33446708/)
51. Rosa J, Vassalo AR, Amarante A, Batista de Carvalho LAE, Marques MPM, Ferreira MT, et al. Burned and buried: A vibrational spectroscopy analysis of burial-related diagenetic changes of heat-altered human bones. *Am J Biol Anthropol*. 2023;180(3):534–47. <https://doi.org/10.1002/ajpa.24691> PMID: [36790610](https://pubmed.ncbi.nlm.nih.gov/36790610/)
52. Paba R, Thompson TJU, Fanti L, Lugliè C. Rising from the ashes: A multi-technique analytical approach to determine cremation. A case study from a Middle Neolithic burial in Sardinia (Italy). *Journal of Archaeological Science: Reports*. 2021;36:102855. <https://doi.org/10.1016/j.jasrep.2021.102855>
53. McKinley JI. Cremations: expectations, methodologies and realities. In: Roberts CA, Lee F, Bintliff J, editors. *Burial Archaeology: Current Research, Methods and Developments*. Oxford: BAR. 1989. p. 65–76.
54. McKinley JI. In the heat of the pyre. In: Schmidt CW, Symes SA, editors. *The analysis of burned human remains*. 2nd ed. Elsevier Ltd. 2015.
55. McKinley JI. Complexities of the Ancient Mortuary Rite of Cremation: An Osteoarchaeological Conundrum. *Isotopic Landscapes in Bioarchaeology*. Springer Berlin Heidelberg. 2016. p. 17–41. [https://doi.org/10.1007/978-3-662-48339-8\\_2](https://doi.org/10.1007/978-3-662-48339-8_2)
56. Hiller JC, Thompson TJU, Evison MP, Chamberlain AT, Wess TJ. Bone mineral change during experimental heating: an X-ray scattering investigation. *Biomaterials*. 2003;24(28):5091–7. [https://doi.org/10.1016/s0142-9612\(03\)00427-7](https://doi.org/10.1016/s0142-9612(03)00427-7) PMID: [14568425](https://pubmed.ncbi.nlm.nih.gov/14568425/)
57. Walker PL, Miller KWP, Richman R. Time, temperature, and oxygen availability: an experimental study of the effects of environmental conditions on the color and organic content of cremated bone. *The Analysis of Burned Human Remains*. Elsevier. 2008. p. 129–xi. <https://doi.org/10.1016/b978-012372510-3.50009-5>
58. Waterhouse K. The effect of weather conditions on burnt bone fragmentation. *J Forensic Leg Med*. 2013;20(5):489–95. <https://doi.org/10.1016/j.jflm.2013.03.016> PMID: [23756520](https://pubmed.ncbi.nlm.nih.gov/23756520/)
59. Waterhouse K. The effect of victim age on burnt bone fragmentation: implications for remains recovery. *Forensic Sci Int*. 2013;231(1–3):409.e1–7. <https://doi.org/10.1016/j.forsciint.2013.04.032> PMID: [23683947](https://pubmed.ncbi.nlm.nih.gov/23683947/)

60. Yermán L, Wall H, Carrascal J, Browning A, Chandraratne D, Nguyen C, et al. Experimental study on the fuel requirements for the thermal degradation of bodies by means of open pyre cremation. *Fire Safety Journal*. 2018;98:63–73. <https://doi.org/10.1016/j.firesaf.2018.04.007>
61. Alunni V, Grevin G, Buchet L, Quatrehomme G. Forensic aspect of cremations on wooden pyre. *Forensic Sci Int*. 2014;241:167–72. <https://doi.org/10.1016/j.forsciint.2014.05.023> PMID: 24949561
62. Carroll EL, Smith M. Burning questions: Investigations using field experimentation of different patterns of change to bone in accidental vs deliberate burning scenarios. *Journal of Archaeological Science: Reports*. 2018;20:952–63. <https://doi.org/10.1016/j.jasrep.2018.02.001>
63. McKinley JI. Cremation...the cheap option? In: Knusel C, Gowland R, editors. *The Social Archaeology of Funerary Remains*. Oxford: Oxbow Books. 2006. p. 81–8.
64. Van Gennep A. *The rites of passage*. Illinois, USA: The University of Chicago Press. 1960.
65. Noy D. 'Half-burnt on an Emergency Pyre': Roman Cremations which Went Wrong. *Greece & Rome*. 2000;47(2):186–96. <https://doi.org/10.1093/gr/47.2.186>
66. Connor M, Baigent C, Hansen ES. Testing the Use of Pigs as Human Proxies in Decomposition Studies. *J Forensic Sci*. 2018;63(5):1350–5. <https://doi.org/10.1111/1556-4029.13727> PMID: 29284073
67. Stamataki E, De Mulder G, Hermans RM, Vercauteren M, Snoeck C. Recorded temperatures, infrared and isotope data from seasonal cremation experiments. *Zenodo*. 2025. <https://doi.org/10.5281/zenodo.14760946>
68. HNMS. Hellenic National Meteorological Service. 2024. Accessed 28/01/2025. <http://www.emy.gr/emv/en/>
69. Snoeck C, Pellegrini M. Comparing bioapatite carbonate pre-treatments for isotopic measurements: Part 1—Impact on structure and chemical composition. *Chemical Geology*. 2015;417:394–403. <https://doi.org/10.1016/j.chemgeo.2015.10.004>
70. Sharp Z. *Principles of Stable Isotope Geochemistry*. London: Pearson Education Ltd. 2007.
71. Hoefs J. *Stable Isotope Geochemistry*. 7th ed. Springer. 2015.
72. de Winter NJ, Snoeck C, Claeys P. Seasonal Cyclicity in Trace Elements and Stable Isotopes of Modern Horse Enamel. *PLoS One*. 2016;11(11):e0166678. <https://doi.org/10.1371/journal.pone.0166678> PMID: 27875538
73. Kontopoulos I, Presslee S, Penkman K, Collins MJ. Preparation of bone powder for FTIR-ATR analysis: The particle size effect. *Vibrational Spectroscopy*. 2018;99:167–77. <https://doi.org/10.1016/j.vibspec.2018.09.004>
74. Reidsma FH, van Hoesel A, van Os BJH, Megens L, Braadbaart F. Charred bone: Physical and chemical changes during laboratory simulated heating under reducing conditions and its relevance for the study of fire use in archaeology. *Journal of Archaeological Science: Reports*. 2016;10:282–92. <https://doi.org/10.1016/j.jasrep.2016.10.001>
75. van Hoesel A, Reidsma FH, van Os BJH, Megens L, Braadbaart F. Combusted bone: Physical and chemical changes of bone during laboratory simulated heating under oxidising conditions and their relevance for the study of ancient fire use. *Journal of Archaeological Science: Reports*. 2019;28:102033. <https://doi.org/10.1016/j.jasrep.2019.102033>
76. Stamataki E, Salesse K, Capuzzo G, Kontopoulos I, Hlad M, Dalle S. Isotope and infrared data from five Belgian Gallo-Roman cemeteries. *IsoArch*. <https://doi.org/10.48530/isoarch.2025.002>
77. Stamataki E, Salesse K, Capuzzo G, Kontopoulos I, Hlad M, Dalle S, et al. The Roman way: Investigating the cremation conditions during the Roman period in Belgium using a multi-proxy and multi-sampling approach. *Journal of Archaeological Science: Reports* Forthcoming. 2025.
78. Wood JW, Milner GR, Harpending HC, Weiss KM, Cohen MN, Eisenberg LE, et al. The Osteological Paradox: Problems of Inferring Prehistoric Health from Skeletal Samples [and Comments and Reply]. *Current Anthropology*. 1992;33(4):343–70. <https://doi.org/10.1086/204084>
79. Jones RP. Excess Winter Mortality (EWM) as a Dynamic Forensic Tool: Where, When, Which Conditions, Gender, Ethnicity and Age. *Int J Environ Res Public Health*. 2021;18(4):2161. <https://doi.org/10.3390/ijerph18042161> PMID: 33672133
80. Dewan M. The cost of cremation in India. *Hinduism Today*. 2023. Accessed 16/10/2024 <https://www.hinduismtoday.com/hpi/2023/11/08/the-cost-of-cremation-in-india/>
81. Ward G. Hindu Cremations: Environmental Damage from Hindu cremations. Facts and Details. 2024. Accessed 16/10/2024 <https://factsanddetails.com/world/cat55/sub388/entry-5652.html>
82. Halstead P, O'Shea J. Introduction: Cultural responses to risk and uncertainty. In Halstead P, O'Shea J, (editors) *Bad year economics: Cultural responses to risk and uncertainty*. Cambridge University Press, Cambridge. 1989. p. 1–7. <https://doi.org/10.1017/CBO9780511521218>
83. Bosworth J, Wülker RP, editors. *A description of Europe and the voyages of Othere and Wulfstan*. London: Longman, Green, Longman, and Roberts. 1855.
